# Supplementary material
Source: PubMed Central journal article supplement (PMC3383225)
Supplement: supp_139.14.2477_DEV077214TableS1.pdf [file supp_139.14.2477_DEV077214TableS1.pdf]

**Table S1. Quantification of astrocyte proliferation in various genotypes**

| Genotype        | Counted area     | Average number of cells |     | EdU injections | Percentage | Normalized to 1 |
|-----------------|------------------|-------------------------|-----|----------------|------------|-----------------|
|                 |                  | counted ( <i>n</i> =3)  | Age |                |            |                 |
| Aldh1L1-GFP     | Half spinal cord | 288                     | E18 | E15-17         | 41.2       |                 |
|                 |                  | 329                     | P3  | P1-3           | 23.8       |                 |
|                 |                  | 333                     | P8  | P6-8           | 3.0        |                 |
| Aldh1L1-GFP     | Dorsal           | 34                      | E16 | 2 hours        | 7          |                 |
|                 | Intermediate     | 57                      | E16 | 2 hours        | 21         |                 |
|                 | Ventral          | 34                      | E16 | 2 hours        | 23         |                 |
| Aldh1L1-GFP     | Dorsal           | 65                      | E18 | 2 hours        | 11         |                 |
|                 | Intermediate     | 141                     | E18 | 2 hours        | 13         |                 |
|                 | Ventral          | 61                      | E18 | 2 hours        | 15         |                 |
| Braf KO control | Dorsal           | 63                      | E18 | E15-17         | 29         | 1               |
|                 | Intermediate     | 157                     | E18 | E15-17         | 41.30      | 1               |
|                 | Ventral          | 67.7                    | E18 | E15-17         | 52         | 1               |
| Braf KO mutant  | Dorsal           | 47                      | E18 | E15-17         | 27         | 0.92            |
|                 | Intermediate     | 133                     | E18 | E15-17         | 34         | 0.83            |
|                 | Ventral          | 61.3                    | E18 | E15-17         | 44         | 0.84            |
| Braf KO control | Dorsal           | 115                     | P8  | E16-18         | 14         | 1               |
|                 | Intermediate     | 152                     | P8  | E16-18         | 34         | 1               |
|                 | Ventral          | 69                      | P8  | E16-18         | 48         | 1               |
| Braf KO mutant  | Dorsal           | 91                      | P8  | E16-18         | 14         | 1               |
|                 | Intermediate     | 139                     | P8  | E16-18         | 25         | 0.72            |
|                 | Ventral          | 73.3                    | P8  | E16-18         | 34         | 0.72            |
| Braf KO control | Dorsal           | 99                      | P3  | P1-3           | 23         | 1               |
|                 | Intermediate     | 174                     | P3  | P1-3           | 21         | 1               |
|                 | Ventral          | 75                      | P3  | P1-3           | 28         | 1               |
| Braf KO mutant  | Dorsal           | 94                      | P3  | P1-3           | 20         | 0.85            |
|                 | Intermediate     | 161                     | P3  | P1-3           | 17         | 0.83            |
|                 | Ventral          | 80                      | P3  | P1-3           | 24         | 0.87            |
| Braf-CA control | Dorsal           | 73                      | E18 | E15-17         | 14         | 1               |

|                            |              |      |     |        |      |      |
|----------------------------|--------------|------|-----|--------|------|------|
|                            | Intermediate | 123  | E18 | E15-17 | 20   | 1    |
|                            | Ventral      | 65   | E18 | E15-17 | 29   | 1    |
| Braf-CA mutant             | Dorsal       | 88   | E18 | E15-17 | 18   | 1.3  |
|                            | Intermediate | 142  | E18 | E15-17 | 30   | 1.48 |
|                            | Ventral      | 71.3 | E18 | E15-17 | 37   | 1.27 |
| Braf-CA control            | Dorsal       | 117  | P3  | P1-3   | 17   | 1    |
|                            | Intermediate | 167  | P3  | P1-3   | 21   | 1    |
|                            | Ventral      | 80.7 | P3  | P1-3   | 19   | 1    |
| Braf-CA mutant             | Dorsal       | 132  | P3  | P1-3   | 21   | 1.23 |
|                            | Intermediate | 191  | P3  | P1-3   | 29   | 1.37 |
|                            | Ventral      | 90.7 | P3  | P1-3   | 27   | 1.44 |
| Braf-CA control            | WM           | 86   | P7  |        | 3.30 |      |
| Braf-CA mutant             | WM           | 121  | P7  |        | 4.10 |      |
| Braf-CA Ink <sup>-/-</sup> | WM           | 96   | P7  |        | 8.70 |      |
| Braf-CA control            | WM           | 103  | P14 |        | 0.91 |      |
| Braf-CA mutant             | WM           | 143  | P14 |        | 1.67 |      |
| Braf-CA Ink <sup>-/-</sup> | WM           | 112  | P14 |        | 1.23 |      |
